# Supplementary material
Source: Springer Nature journal article supplement (https://www.springermedizin.de/resource/supplementary/13075_2012_3589_MOESM6_ESM.pdf/9694872)

**A****GDFLAEGGGV**R****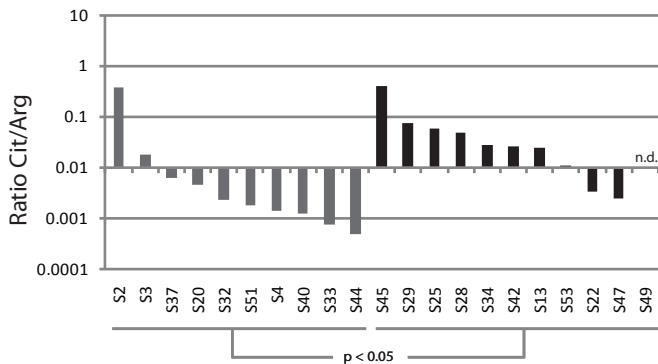**B****SGEGD**F**LAEGGGV**R****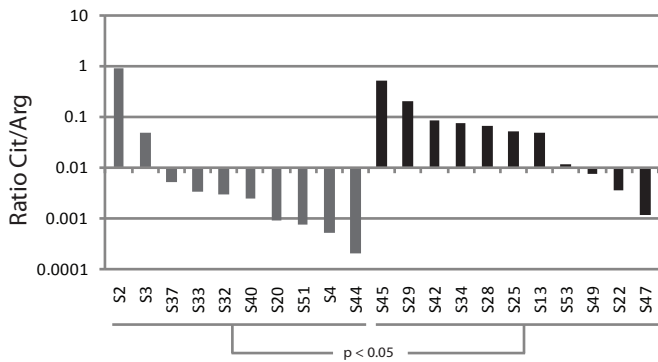

Supplement: MOESM6 [file 9694872]
